# Supplementary material for: Hydrothermal synthesis of novel Mn3O4 nano-octahedrons with enhanced supercapacitors performances
Source: Royal Society of Chemistry journal article supplement (doi:10.1039/c0nr00257g), 2010-01-01
Supplement: c0nr00257g.pdf [file c0nr00257g.pdf]

## **Supplementary information**

### **Hydrothermal synthesis of novel Mn<sub>3</sub>O<sub>4</sub> nano-octahedrons with enhanced supercapacitors performances**

Hao Jiang,<sup>a,b</sup> Ting Zhao,<sup>b</sup> Chaoyi Yan,<sup>b</sup> Jan Ma<sup>\*a,b</sup> and Chunzhong Li<sup>c</sup>

<sup>a</sup> Temasek Laboratories, Nanyang Technological University, Singapore 637553, Singapore

<sup>b</sup> School of Materials Science and Engineering, Nanyang Technological University, Singapore 639798, Singapore

<sup>c</sup> Key Laboratory for Ultrafine Materials of Ministry of Education, School of Materials Science and Engineering, East China University of Science & Technology, Shanghai, 200237, China

\* Electronic mail: [asjma@ntu.edu.sg](mailto:asjma@ntu.edu.sg) (Prof. Jan Ma);

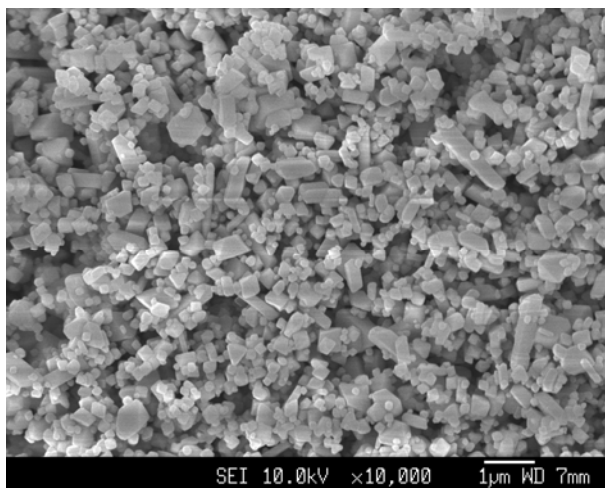

**Figure S1** A SEM image of the Mn<sub>3</sub>O<sub>4</sub> nanoparticles prepared without the addition of HNO<sub>3</sub>.

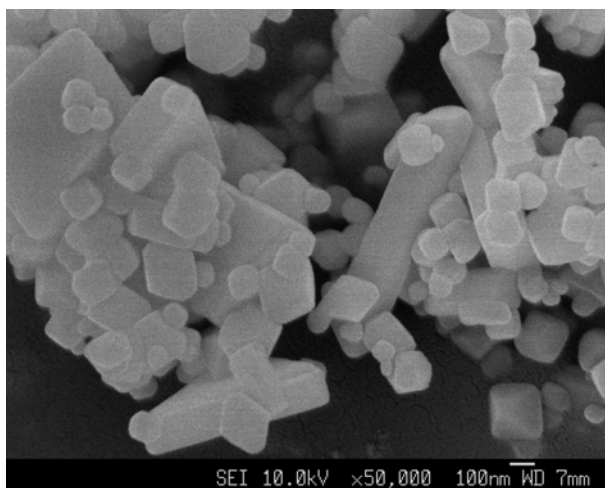

**Figure S2** A SEM image of the products when the EDTA-2Na concentration is 0.5 mmol

EDTA-2Na is a strong coordinating agent, which could form a very stable complex by coordinating with  $\text{MnO}^-$  and modify the growth rate of the  $\text{Mn}_3\text{O}_4$  crystal by binding crystal facets.<sup>28-30</sup> The chemical reactions can be expressed by the following equations.<sup>28, S1</sup> This was confirmed by the fact that the solution color changed from purple to black brown soon after the addition of EDTA-2Na. Furthermore, we have investigated the effect of EDTA-2Na concentration. When the EDTA-2Na concentration decreased to 0.5 mmol, the final products have no obvious change, unordered shapes, as shown in Figure 2S. Upon increasing to 2 mmol, no products can be obtained due to the increase in acidity, which is not conducive to the growth of MnOx. This is further proven as when keeping other conditions constant, no products can be obtained after adding double  $\text{HNO}_3$  concentrations. The results indicate that EDTA-2Na concentration plays an important role in the formation of  $\text{Mn}_3\text{O}_4$  nano-octahedrons.

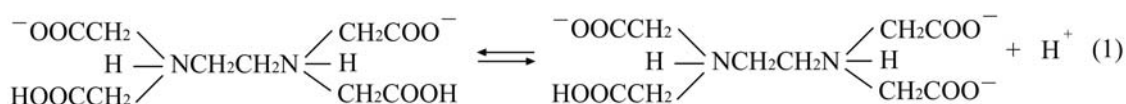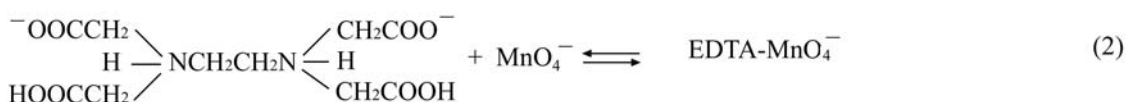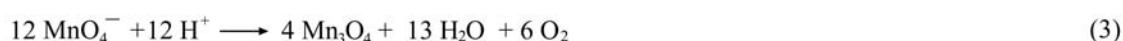

Ref S1 P. Umek, A. Goter, M. pregelj, et al. *J. Phys. Chem. C*, 2009, **113**, 14798
